# Supplementary material
Source: Research Square preprint supplement (doi:10.21203/rs.3.rs-9101394/v1)
Supplement: Supplementary file 1 [file 5d26053b189c5704accbabe3.docx]

**Supplementary Figure 1**

  Cases with both pre- and post-operative QOL questionnaire and oral function detailed examination data: **32 cases**

MRONJ surgical cases with QOL survey data:

**48 cases**

Preoperative detailed oral function assessment:

**47 cases**

Cases with both pre- and post-operative QOL questionnaire responses: **43 cases**

Cases with preoperative periodontal parameter assessment:

**18 cases**

Cases where follow-up observation is in progress, death occurs, or visits to the hospital are difficult due to other illnesses:

11 cases

**Supplementary Figure S1** shows the patient selection process and data availability. Among the 48 cases of medication-related osteonecrosis of the jaw (MRONJ) treated surgically who provided quality of life (QOL) questionnaire responses, preoperative detailed oral function assessments were available for 47 cases. Both pre- and post-operative QOL questionnaire responses were obtained in 43 cases. After excluding 11 cases due to ongoing follow-up, death, or difficulty visiting the hospital, 32 cases provided complete data for both QOL questionnaires and detailed oral function examinations. Additionally, preoperative periodontal parameters were evaluated in 18 cases.
