# Supplementary material
Source: Research Square preprint supplement (doi:10.21203/rs.3.rs-9101394/v1)
Supplement: Supplementary file 2 [file 66b2fdb0da254a0460ab2e48.docx]

**Supplementary Information**

**Supplementary Table S1. Baseline demographic and clinical characteristics of patients with medication-related osteonecrosis of the jaw (MRONJ) (n=48)**

| Characteristic | Value |
| --- | --- |
| **Demographics** |  |
| Age, years, median (range) | 73 (47–93) |
| Sex, male/female, n | 18 / 30 |
| Body mass index, kg/m², median (range) | 21.0 (15.6–30.3) |
| Smoker / Non-smoker, n | 18 / 30 |
| Drinker / Never, n | 32 / 16 |
|  |  |
| **Medical history** |  |
| Malignancy, n | 32 |
| Diabetes mellitus, n | 10 |
| Corticosteroid use (yes/no), n | 20 / 28 |
| Immunosuppressant use, n | 3 |
| Chemotherapy (excluding antiresorptives) (yes/no), n | 29 / 19 |
|  |  |
| **Antiresorptive agents** |  |
| Primary indication |  |
| Malignancy | 27 |
| Osteoporosis | 21 |
| Duration of antiresorptive therapy, months, median (range) | 56 (6–240) |
| Bisphosphonates, n | 18 |
| Denosumab, n | 32 |
|  |  |
| **MRONJ stage (AAOMS)** |  |
| Stage 1 | 0 |
| Stage 2 | 31 |
| Stage 3 | 17 |
|  |  |
| **Location of MRONJ** |  |
| Maxilla | 14 |
| Mandible | 30 |
| Both | 4 |
|  |  |
| **Clinical manifestations** |  |
| Infection | 48 |
| Bone exposure | 29 |
| External dental fistula | 3 |
| Sensory disturbance | 10 |
| Pathological fracture | 1 |
|  |  |
| **Surgical procedures** |  |
| Sequestrectomy with peripheral ostectomy | 7 |
| Partial maxillectomy | 13 |
| Marginal mandibulectomy | 19 |
| Segmental mandibulectomy | 11 |
| Hemimandibulectomy | 2 |

AAOMS: American Association of Oral and Maxillofacial Surgeons

**Supplementary Table S2**

Steel test results comparing the post-treatment periods with baseline (preoperative) in all cases

| Outcome variable | Comparison | Hodges–Lehmann estimate | 95% CI | Z value | *p* value |
| --- | --- | --- | --- | --- | --- |
| Swallowing function | 3M vs. Pre | 0 | 0–1.0 | 0.66 | 0.741 |
|  | 6M vs. Pre | 0 | 0–1.0 | 0.75 | 0.680 |
| Degree of tongue coating | 3M vs. Pre | 0.0 | −11.1–16.6 | 0.50 | 0.842 |
|  | 6M vs. Pre | 5.6 | −11.1–22.2 | 0.85 | 0.614 |
| Oral bacterial count | 3M vs. Pre | 74.5 | −271–476.5 | 0.52 | 0.828 |
|  | 6M vs. Pre | 268 | −198–680 | 1.38 | 0.289 |
| Salivary flow volume | 3M vs. Pre | −0.14 | −1.03–0.80 | −0.33 | 0.928 |
|  | 6M vs. Pre | 0.21 | −0.74–1.19 | 0.68 | 0.730 |
| Occlusal force | 3M vs. Pre | −33.1 | −170–89.2 | −0.61 | 0.776 |
|  | 6M vs. Pre | −25.2 | −170–123 | −0.39 | 0.897 |
| Tongue pressure | 3M vs. Pre | 0.3 | −4.0–4.6 | 0.16 | 0.983 |
|  | 6M vs. Pre | −0.7 | −5.6–3.3 | −0.30 | 0.939 |
| Oral mucosal moisture | 3M vs. Pre | −0.8 | −2.0–0.5 | −1.41 | 0.276 |
|  | 6M vs. Pre | −0.1 | −1.4–1.1 | −0.25 | 0.957 |
| Masticatory function | 3M vs. Pre | −21.0 | −57.5–14.5 | −1.30 | 0.329 |
|  | 6M vs. Pre | −18.3 | −60.5–23.0 | −0.91 | 0.571 |
| Lip motor function /pa/ | 3M vs. Pre | −0.4 | −0.8–0 | −2.10 | 0.081 |
|  | 6M vs. Pre | −0.2 | −0.6–0 | −1.63 | 0.183 |
| Lip motor function /ta/ | 3M vs. Pre | −0.2 | −0.6–0.2 | −0.82 | 0.628 |
|  | 6M vs. Pre | −0.2 | −0.8–0.4 | −0.78 | 0.660 |
| Lip motor function /ka/ | 3M vs. Pre | −0.2 | −0.6–0.4 | −0.49 | 0.845 |
|  | 6M vs. Pre | 0 | −0.4–0.4 | −0.17 | 0.980 |

CI: confidence interval

Non-parametric multiple comparisons were performed using the Steel test with the preoperative period as the control. No statistically significant differences were observed after adjustment for multiple comparisons.

Occlusal force and masticatory function were compared among evaluation periods using the Steel test with the preoperative period as the control, including all available cases regardless of missing follow-up data. No significant differences were observed between the preoperative period and 3 months or 6 months for occlusal force (3M vs. Before: *p* = 0.776; 6M vs. Before: *p* = 0.897) or masticatory function (3M vs. Before: *p* = 0.329; 6M vs. Before: *p* = 0.571). Hodges–Lehmann estimates and 95% confidence intervals are shown. Kruskal–Wallis and Jonckheere–Terpstra tests also indicated no significant overall or monotonic trends across periods (all *p* > 0.05).

**Supplementary Table S3.**

| Parameter | N  (recurrence + / −) | Summary (median, IQR) | Statistical test | *p value* |
| --- | --- | --- | --- | --- |
| Bleeding Index (BI) | 7 / 25 | Rec (+): 14.9 (5.6–25.6)  Rec (−): 8.4 (4.6–18.2) | Wilcoxon rank-sum | 0.438 |
|  |  |  | Kruskal–Wallis | 0.425 |
| PISA (mm²) | 5 / 13 | Rec (+): 159.4 (119.4–297.4)  Rec (−): 33.0 (22.1–126.5) | Wilcoxon rank-sum | 0.061 |
|  |  |  | Kruskal–Wallis | 0.055 |
| PESA (mm²) | 5 / 13 | Rec (+): 1080.8 (559.4–1279.4)  Rec (−): 938.3 (666.4–1112.7) | Wilcoxon rank-sum | 0.767 |
|  |  |  | Kruskal–Wallis | 0.730 |
| Sites with PPD ≥4 mm (%) | 6 / 25 | Rec (+): 5.9 (3.6–34.4)  Rec (−): 13.6 (6.9–27.6) | Wilcoxon rank-sum | 0.453 |
|  |  |  | Kruskal–Wallis | 0.438 |

IQR: interquartile range

Comprehensive univariate analyses of demographic, disease-related, treatment-related, surgical, oral functional, and periodontal parameters associated with postoperative recurrence of medication-related osteonecrosis of the jaw (MRONJ). Periodontal parameters (bleeding index [BI], periodontal inflamed surface area [PISA], periodontal epithelial surface area [PESA], and proportion of probing pocket depth [PPD]≥4 mm sites) were evaluated in dentate patients only; edentulous patients and those with severe tooth mobility were excluded, resulting in variable sample sizes and missing data. Continuous variables were compared using the Wilcoxon rank-sum test and Kruskal–Wallis test. All tests were two-sided, and *p* values are reported without adjustment for multiple comparisons.

**Supplementary Table S4. Multivariable logistic regression analyses for recurrence (n = 47)**

|  | Model A | | |  | Model B | | |
| --- | --- | --- | --- | --- | --- | --- | --- |
| Variable | OR | 95% CI | *p* value |  | OR | 95% CI | *p* value |
| High-dose antiresorptive therapy (vs. low-dose) | 0.76 | 0.28–2.09 | 0.584 |  | 1.12 | 0.38–3.27 | 0.840 |
| Chemotherapy (vs. no) | 5.30 | 1.28–21.9 | 0.021 |  | 10.4 | 2.03–53.4 | 0.0049 |
| High masticatory function (≥187 mg/dL) | 2.15 | 0.93–4.97 | 0.060 |  | - | - | - |
| Segmental resection (vs. conservative surgery) | - | - | - |  | 6.63 | 1.79–24.5 | 0.0052 |

OR: odds ratio, CI: confidence interval

“Conservative surgery” refers to peripheral ostectomy, partial maxillectomy, and marginal mandibulectomy.

|  | Model A | Model B |
| --- | --- | --- |
| Likelihood ratio χ² (df = 3) | 14.10 | 18.38 |
| Model *p* value | 0.0028 | 0.0004 |
| Nagelkerke R² | 0.290 | 0.378 |
| AICc | 43.5 | 39.2 |
| Lack-of-fit test (*p*) | 0.78 | 1.00 |

AICc: Akaike Information Criterion corrected for small sample sizes

**Multivariable logistic regression analyses for recurrence (n = 47)**

Odds ratios (ORs) and 95% confidence intervals (CIs) were estimated using multivariable logistic regression. Two separate models were constructed to avoid overfitting and multicollinearity due to the limited sample size. Model A included oral functional parameters, whereas Model B included treatment-related factors. *p* values were calculated using likelihood ratio tests. In both models, concomitant chemotherapy was consistently and independently associated with an increased risk of recurrence. In Model A, high masticatory function showed a trend toward association with recurrence, although it did not reach statistical significance. In Model B, segmental resection was significantly associated with recurrence, likely reflecting underlying disease severity rather than the surgical procedure itself. High-dose antiresorptive therapy was not significantly associated with recurrence in either model.

**Supplementary Table S5: Univariate Cox proportional hazards analysis for time to recurrence (n = 47)**

| Variable | | Comparison | HR | 95% CI | *p* value |
| --- | --- | --- | --- | --- | --- |
| **Chemotherapy** | | **vs. No** | NA* | NA | **0.003** |
| **Injectable Administration** | | **vs. Oral** | NA* | NA | **0.031** |
| Male sex | | vs. Female | 3.33 | 0.94–11.83 | 0.062 |
| High-dose antiresorptive therapy | | vs. Low | 2.42 | 0.52–11.26 | 0.260 |
| Smoking history | | vs. No | 1.53 | 0.46–5.08 | 0.484 |
| Alcohol consumption | | vs. No | 1.24 | 0.36–4.27 | 0.730 |
| Disease Stage 3 | | vs. Stage 2 | 1.08 | 0.28–3.61 | 0.901 |
| Corticosteroid use | | vs. No | 0.76 | 0.23–2.51 | 0.651 |
|  | * Hazard ratios (HR) could not be reliably estimated due to sparse events and quasi-complete separation.  CI: confidence interval, NA: not applicable | | | | |

Univariate Cox proportional hazards analyses were performed to evaluate factors associated with time to recurrence.
Chemotherapy was significantly associated with a shorter time to recurrence (log-rank *p* = 0.003), although hazard ratio estimation was unstable due to the limited number of events. Injectable administration was also associated with recurrence timing (*p* = 0.031).

Male sex likewise showed a borderline association with recurrence timing. In contrast, smoking history, alcohol consumption, disease stage, antiresorptive dosage, and steroid use were not significantly associated with time to recurrence.

**Supplementary Table S6**

Receiver Operating Characteristic (ROC) Curve Analyses for Oral Functional Parameters

|  | Cut-off values | AUC values |
| --- | --- | --- |
| Masticatory function (mg/dL) | 187 | 0.646 |
| Oral bacterial level | 4 | 0.557 |
| Tongue pressure (kPa) | 28 | 0.576 |
| Occlusal force (N) | 267.3 | 0.492 |
| Oral mucosal moisture | 29.7 | 0.551 |
| Salivary flow volume(g/2min) | 3.32 | 0.600 |
| Degree of tongue coating (%) | 44.4 | 0.696 |

Receiver operating characteristic (ROC) curve analyses were performed to explore potential cut-off values for selected oral functional parameters in relation to recurrence. The area under the curve (AUC) values for most parameters were below 0.70, indicating modest discriminative performance. Therefore, these cut-off values were used for exploratory purposes only and were interpreted with caution. Dichotomized variables based on these cut-offs did not demonstrate statistically significant associations with time to recurrence in Cox proportional hazards analyses.

**Supplementary Table S7: Univariate Cox proportional hazards analyses of oral functional parameters associated with MRONJ recurrence (n = 47)**

| Variable | Comparison (cut-off) | HR | 95% CI | Wald *p* value |
| --- | --- | --- | --- | --- |
| High Masticatory function (≥187 mg/dL) | vs. Low (187 mg/dL) | 2.99 | 0.87–10.35 | 0.083 |
| High Oral bacterial level (≥level 4) | vs. Low (level 4) | 3.39 | 0.90–12.81 | 0.072 |
| High Tongue pressure (≥28 kPa) | vs. Low (<28 kPa) | 3.07 | 0.89–10.63 | 0.072 |
| High Occlusal force (≥267.3 N) | vs. Low (<267.3 N) | 3.33 | 0.82–13.63 | 0.095 |
| Low Oral mucosal moisture (<29.7) | vs. High (≥29.7) | 0.39 | 0.10–1.58 | 0.187 |
| Low Salivary flow volume (<3.32 g/2min) | vs. High (≥3.32 g/2min) | 3.39 | 0.89–12.91 | 0.074 |
| Low degree of tongue coating (<44.4 %) | vs. High (≥44.4 %) | 1.55 | 0.19–12.50 | 0.681 |

Hazard ratios (HRs) and 95% confidence intervals (CIs) were estimated using univariate Cox proportional hazards models. Recurrence was treated as the event, and patients without recurrence were censored. HRs >1 indicate an increased risk of recurrence. *P* values were calculated using the Wald test.
